# Supplementary material
Source: Springer Nature journal article supplement (https://www.springermedizin.de/resource/supplementary/12939_2009_163_MOESM1_ESM.PDF/9551620)
Supplement: MOESM1 [file 9551620]

| <b>Variable Name</b>              | <b>Codes</b>                                                                                                                                                                                                                                                                                                                                                                                                                                                                                                                                                                                                                                                                                                                                                                                                                                                                                                                                                                                                                                                                                |
|-----------------------------------|---------------------------------------------------------------------------------------------------------------------------------------------------------------------------------------------------------------------------------------------------------------------------------------------------------------------------------------------------------------------------------------------------------------------------------------------------------------------------------------------------------------------------------------------------------------------------------------------------------------------------------------------------------------------------------------------------------------------------------------------------------------------------------------------------------------------------------------------------------------------------------------------------------------------------------------------------------------------------------------------------------------------------------------------------------------------------------------------|
| <b>Bibliographic Variables</b>    |                                                                                                                                                                                                                                                                                                                                                                                                                                                                                                                                                                                                                                                                                                                                                                                                                                                                                                                                                                                                                                                                                             |
| Body of Literature                | HP, HC, PH, UH                                                                                                                                                                                                                                                                                                                                                                                                                                                                                                                                                                                                                                                                                                                                                                                                                                                                                                                                                                                                                                                                              |
| Journal Name                      | (String variable)                                                                                                                                                                                                                                                                                                                                                                                                                                                                                                                                                                                                                                                                                                                                                                                                                                                                                                                                                                                                                                                                           |
| Publication Date                  | Year                                                                                                                                                                                                                                                                                                                                                                                                                                                                                                                                                                                                                                                                                                                                                                                                                                                                                                                                                                                                                                                                                        |
| Geographical Origin               | <ul style="list-style-type: none"> <li>-Global, transcontinental</li> <li>-Canada</li> <li>-Europe</li> <li>-Australia, New Zealand, Oceania</li> <li>-Asia, Africa, Middle East</li> <li>-Central, South America, Mexico</li> <li>-United States</li> </ul>                                                                                                                                                                                                                                                                                                                                                                                                                                                                                                                                                                                                                                                                                                                                                                                                                                |
| Study Type                        | <ul style="list-style-type: none"> <li>-Population-Based Survey</li> <li>-Experimental, Quasi-Experimental</li> <li>-Program Evaluation/Description</li> <li>-Case Study, Qualitative, Mixed-Methods</li> <li>-Review (Systematic, Conceptual)</li> <li>-Commentary</li> </ul>                                                                                                                                                                                                                                                                                                                                                                                                                                                                                                                                                                                                                                                                                                                                                                                                              |
| <b>Abstract Content Variables</b> |                                                                                                                                                                                                                                                                                                                                                                                                                                                                                                                                                                                                                                                                                                                                                                                                                                                                                                                                                                                                                                                                                             |
| Article themes                    | <ul style="list-style-type: none"> <li>-Awareness of SDOH, attitudes towards addressing health inequities</li> <li>-Barriers and facilitators to addressing SDOH, health inequities, improving health outcomes</li> <li>-Community development, participation, capacity building, mobilization, social capital or cohesion, impacts or needs assessments</li> <li>-Evaluation or description of health promotion, public health interventions</li> <li>-Gender and health, sexual health</li> <li>-Geography, place, location, environments and health</li> <li>-Healthcare – access, utilization, costs, expenditures, systems, delivery, primary care, human resources</li> <li>-Health outcomes - disabilities, diseases, illnesses, injuries, mortality</li> <li>-Healthy lifestyles – general, diet, exercise, preventive screening, vaccines, alcohol, smoking, drugs, sun exposure, etc.</li> <li>-Income, SES, social class, wealth and health, social gradients</li> <li>-Inter-sectoral collaboration, coordination, comprehensive, inter-disciplinarity, partnerships</li> </ul> |

|                                         |                                                                                                                                                                                                                                                                                                                                                                                                                                                                                                                                                                                                                                                                                                                                                         |
|-----------------------------------------|---------------------------------------------------------------------------------------------------------------------------------------------------------------------------------------------------------------------------------------------------------------------------------------------------------------------------------------------------------------------------------------------------------------------------------------------------------------------------------------------------------------------------------------------------------------------------------------------------------------------------------------------------------------------------------------------------------------------------------------------------------|
|                                         | <ul style="list-style-type: none"> <li>-Healthy child development - maternal, prenatal, neonatal, children, youth, school health</li> <li>-Mental health (including mental illness)</li> <li>-Minority health (Aboriginals, immigrants, refugees, other minorities)</li> <li>-Occupational, employee health and worksite interventions</li> <li>-Oral health (oral hygiene, dental interventions)</li> <li>-Research (conceptual, training, indicators, instruments, methods, knowledge translation, knowledge gaps)</li> <li>-Seniors' health</li> <li>-Social supports, social inclusion, self-efficacy, care-giving, self-empowerment</li> <li>-Social, public, health, urban policy or planning, SDOH, upstream factors, broader context</li> </ul> |
| SDOH                                    | <ul style="list-style-type: none"> <li>-Income and socioeconomic status</li> <li>-Employment and working conditions</li> <li>-Healthy child development</li> <li>-Education and literacy</li> <li>-Personal health practices &amp; coping skills</li> <li>-Health services</li> <li>-Social support networks</li> <li>-Social environments</li> <li>-Physical environments</li> <li>-Biology &amp; genetic endowment</li> <li>-Gender</li> <li>-Culture</li> <li>-More than 3</li> <li>-None specified</li> </ul>                                                                                                                                                                                                                                       |
| <b>Municipal Prescription Variables</b> |                                                                                                                                                                                                                                                                                                                                                                                                                                                                                                                                                                                                                                                                                                                                                         |
| Implicates Municipal Government         | Yes/No                                                                                                                                                                                                                                                                                                                                                                                                                                                                                                                                                                                                                                                                                                                                                  |
| Types of Municipal Roles Implicated     | (String variable)                                                                                                                                                                                                                                                                                                                                                                                                                                                                                                                                                                                                                                                                                                                                       |
